# Supplementary material for: A feed-forward spinal cord glycinergic neural circuit gates mechanical allodynia
Source: JCI journal article supplement (doi:10.1172/jci70026), 2013-08-26
Supplement: sd1 [file 1]

## Supplemental Figures

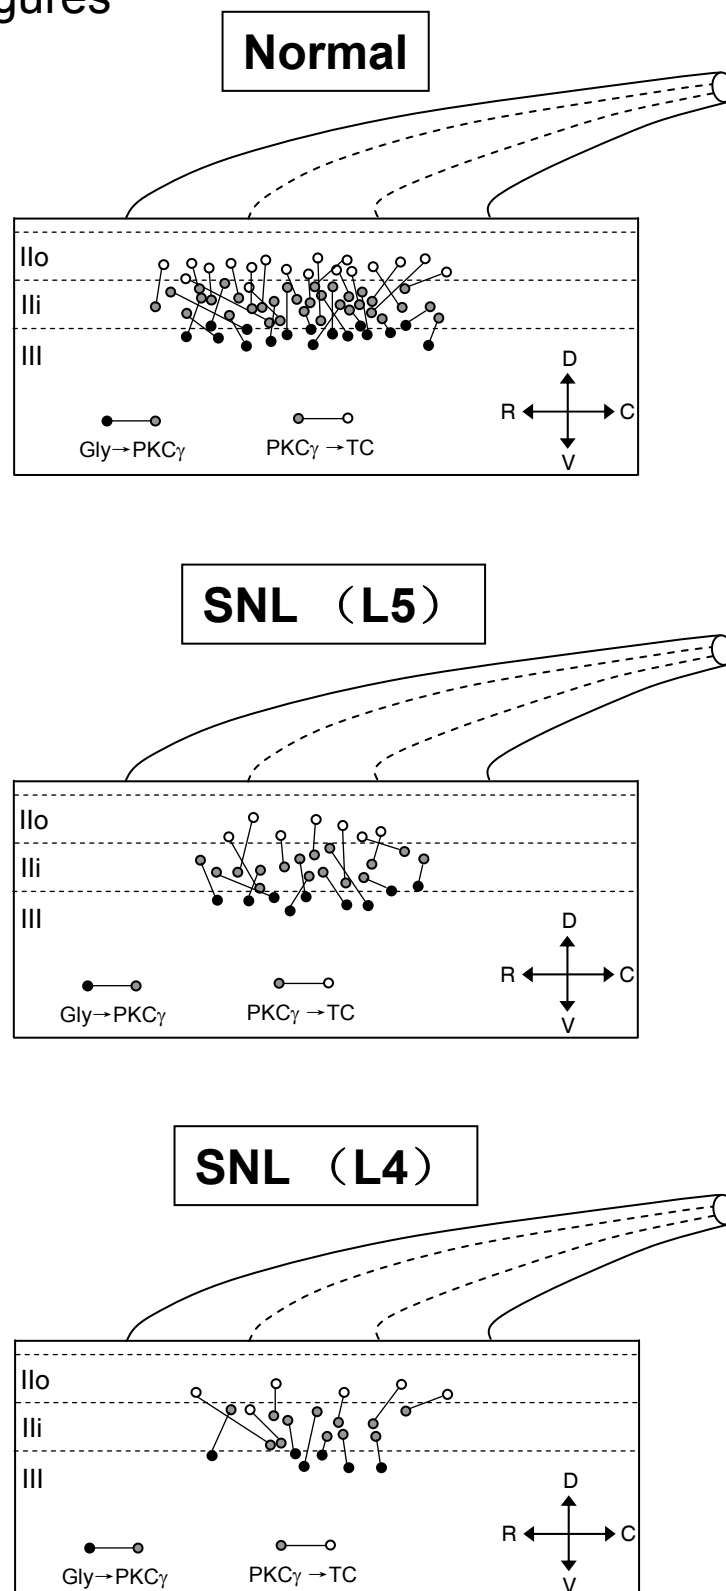

**Figure S1. The relative positions of the recorded neuronal pairs in L4 and L5 slices.** C, Caudal; D, dorsal; R, rostral; V, ventral. Gly: glycinergic cell; PKC $\gamma$ : PKC $\gamma$  positive cell; TC: transient central cell.

## A 30 $\mu\text{m}$ thick optical stacks

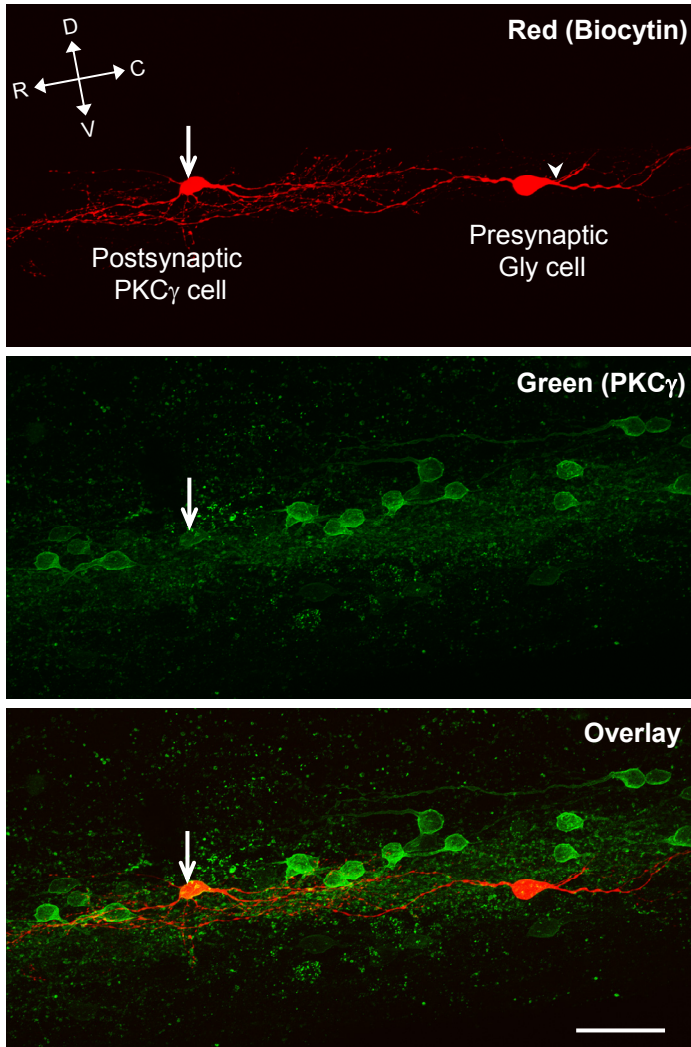

## B 1 $\mu\text{m}$ thick optical stacks

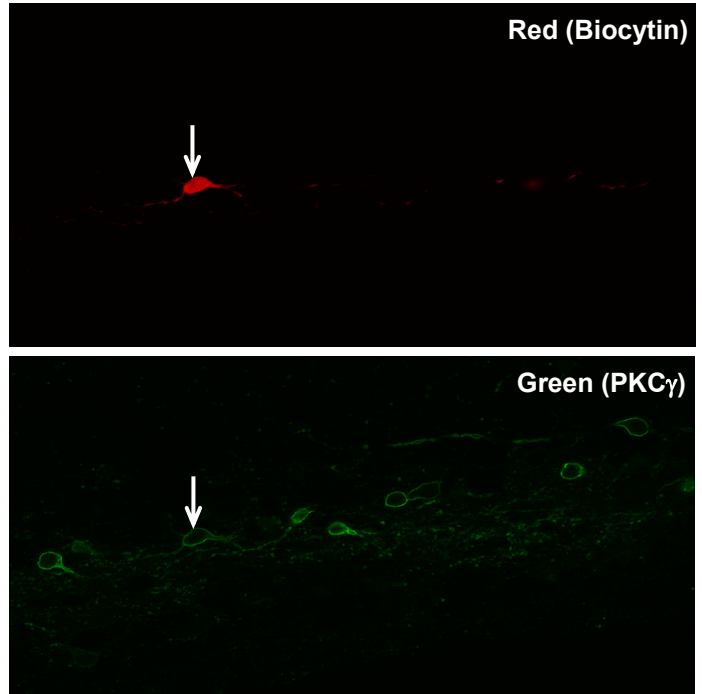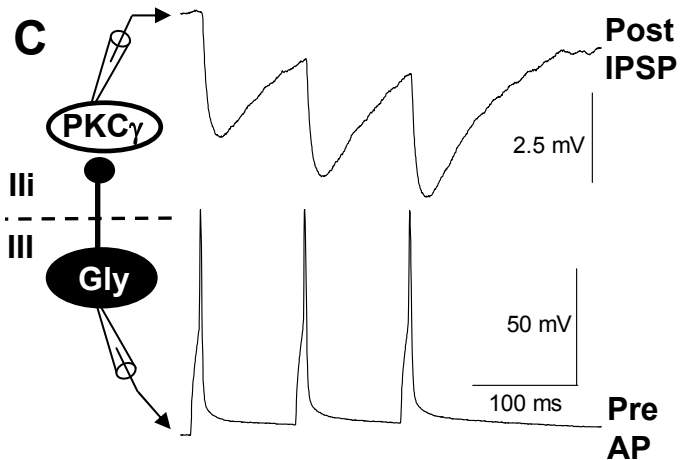

**Figure S2. An example of monosynaptic inhibitory connection between Gly and PKC $\gamma$ <sup>+</sup> neurons sampled from naïve rats. (A)** 30  $\mu\text{m}$  thick optical stack image of morphology and location of the recorded neuronal pair. Arrows indicate the presynaptic PKC $\gamma$ <sup>+</sup> cell, arrowhead indicates putative axon. **(B)** 1  $\mu\text{m}$  thick optical stacks of the recorded PKC $\gamma$ <sup>+</sup> cell. Scale bar, 100  $\mu\text{m}$ . **(C)** Bottom trace recorded from the presynaptic Gly neuron shows action potentials (APs) initiated by three successive depolarizing pulses. Top trace recorded from the postsynaptic PKC $\gamma$ <sup>+</sup> neuron shows evoked unitary IPSPs which display short-term potentiation.

### A 30 $\mu\text{m}$ thick optical stacks

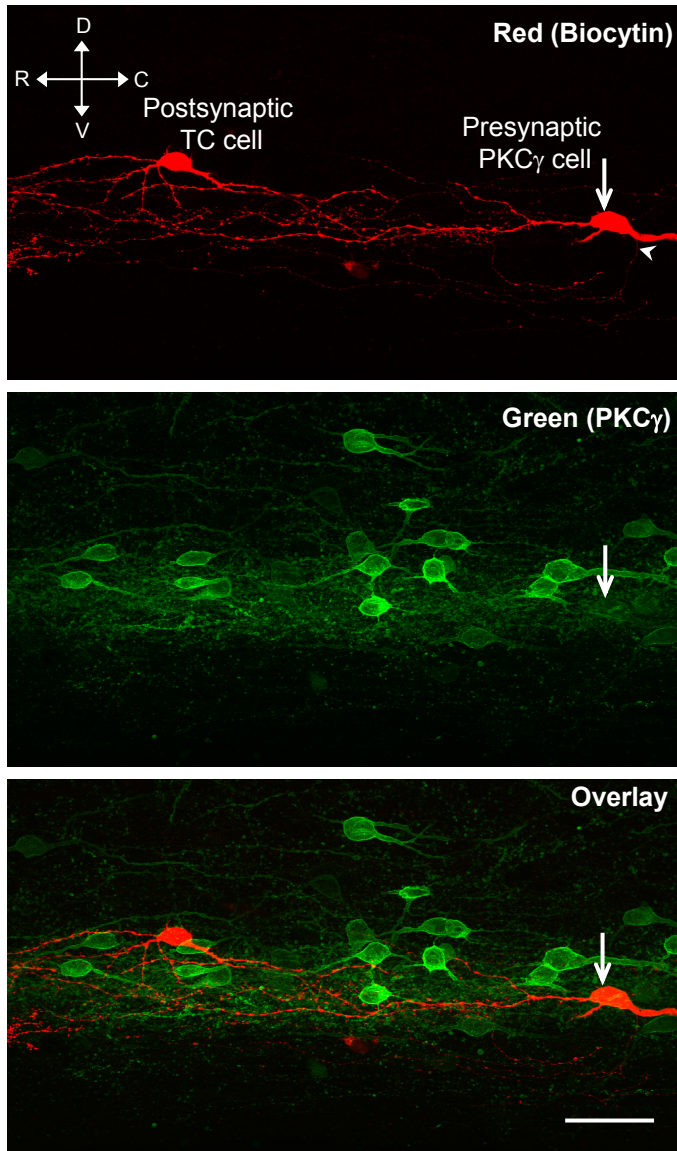

### B 1 $\mu\text{m}$ thick optical stacks

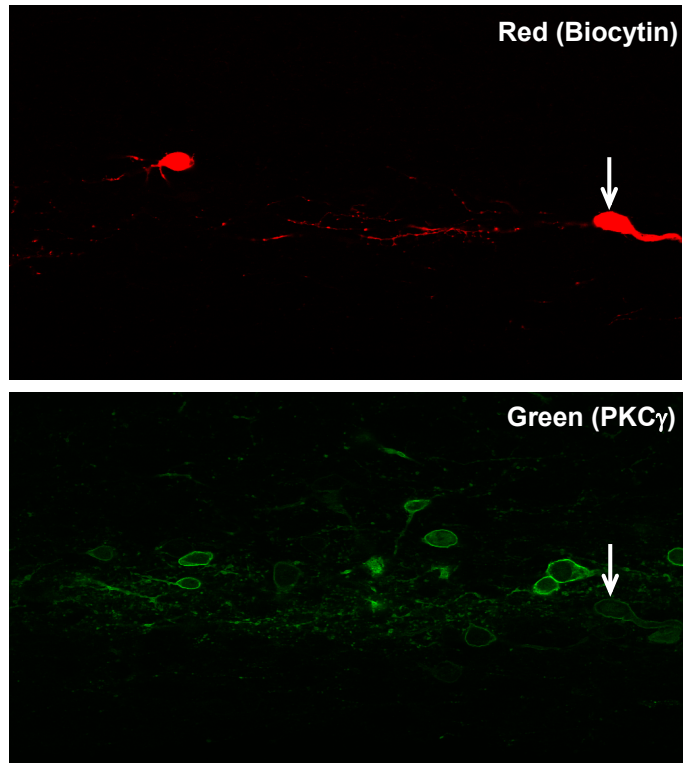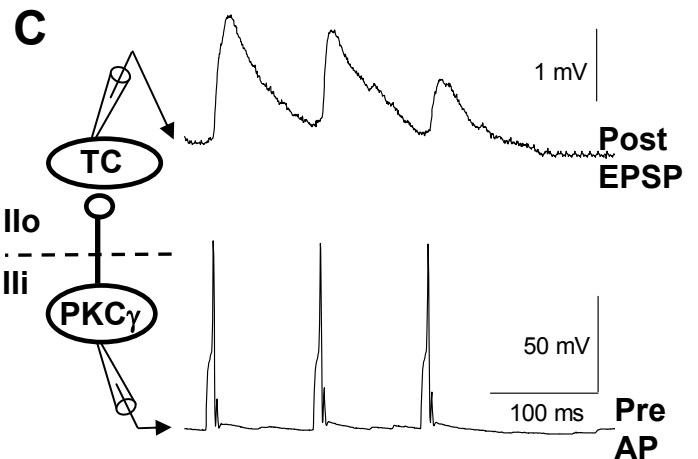

**Figure S3. An example of a monosynaptic excitatory connection between  $\text{PKC}\gamma^+$  and transient central (TC) neurons sampled from naïve rats. (A)** 30  $\mu\text{m}$  thick optical stack image of morphology and location of the recorded neuronal pair. Arrows indicate the presynaptic  $\text{PKC}\gamma^+$  positive cell, arrowhead indicates putative axon. **(B)** 1  $\mu\text{m}$  thick optical stacks of the recorded  $\text{PKC}\gamma^+$  cell. Scale bar, 100  $\mu\text{m}$ . **(C)** Bottom trace recorded from the presynaptic  $\text{PKC}\gamma^+$  neuron shows APs initiated by three successive depolarizing pulses. Top trace recorded from the postsynaptic TC neuron shows evoked unitary EPSPs which display short-term depression.

## A 30 $\mu\text{m}$ thick optical stacks

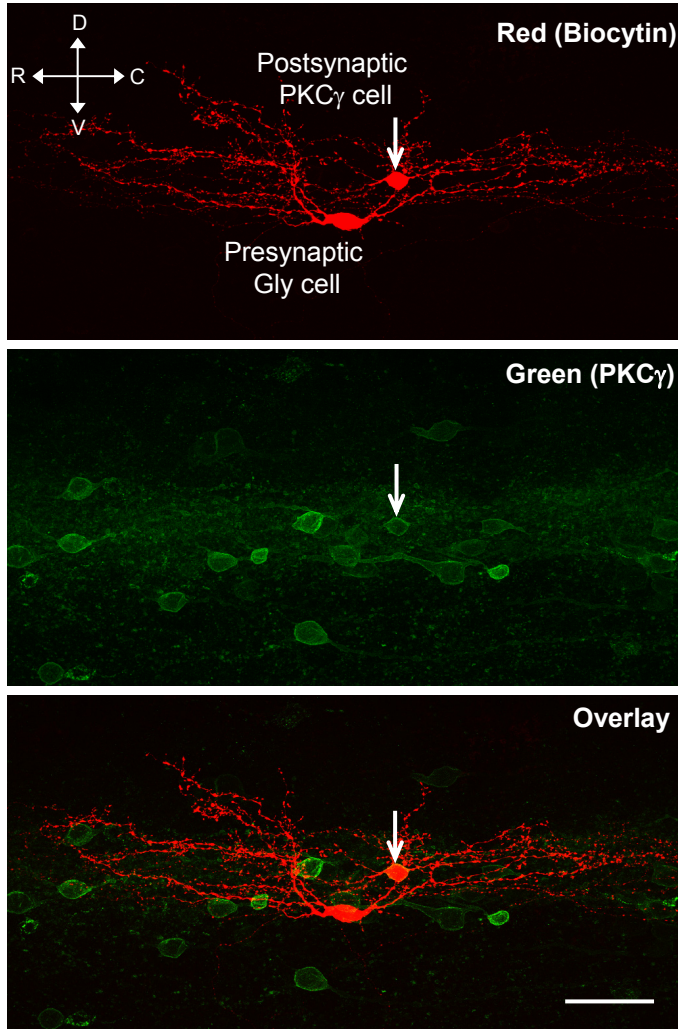

## B 1 $\mu\text{m}$ thick optical stacks

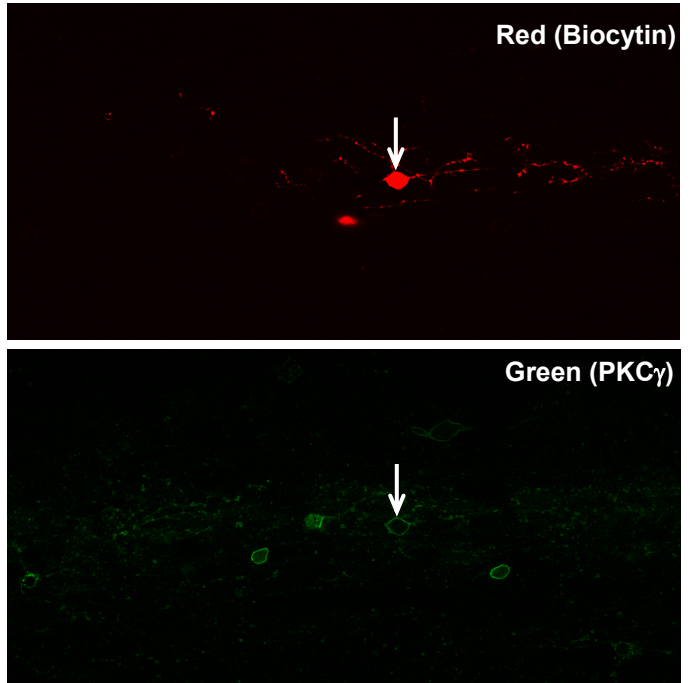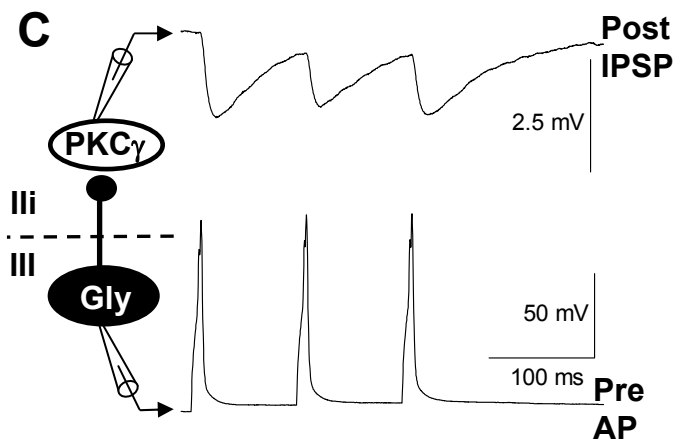

**Figure S4. An example of a monosynaptic inhibitory connection between Gly and PKC $\gamma$ <sup>+</sup> neurons sampled from SNL rats. (A)** 30  $\mu\text{m}$  thick optical stack image of morphology and location of the recorded neuronal pair. Arrows indicate the presynaptic PKC $\gamma$ <sup>+</sup> positive cell. **(B)** 1  $\mu\text{m}$  thick optical stacks of the recorded PKC $\gamma$ <sup>+</sup> cell. Scale bar, 100  $\mu\text{m}$ . **(C)** Bottom trace recorded from the presynaptic Gly neuron shows APs initiated by three successive depolarizing pulses. Top trace recorded from the postsynaptic PKC $\gamma$ <sup>+</sup> neuron shows evoked unitary IPSPs which display short-term depression.



### A 30 $\mu\text{m}$ thick optical stacks

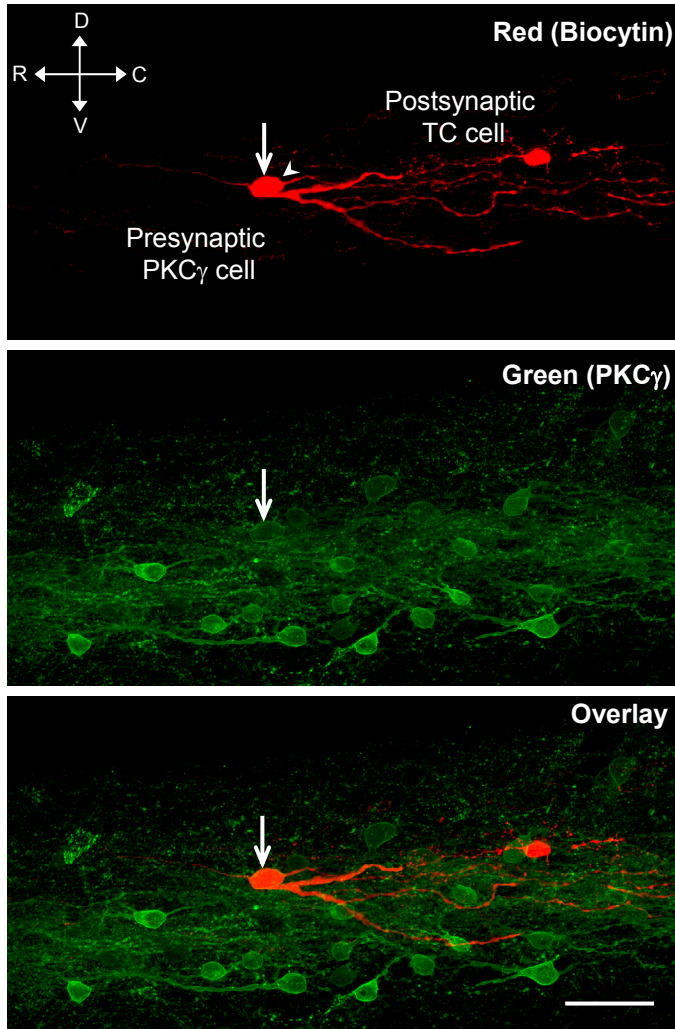

### B 1 $\mu\text{m}$ thick optical stacks

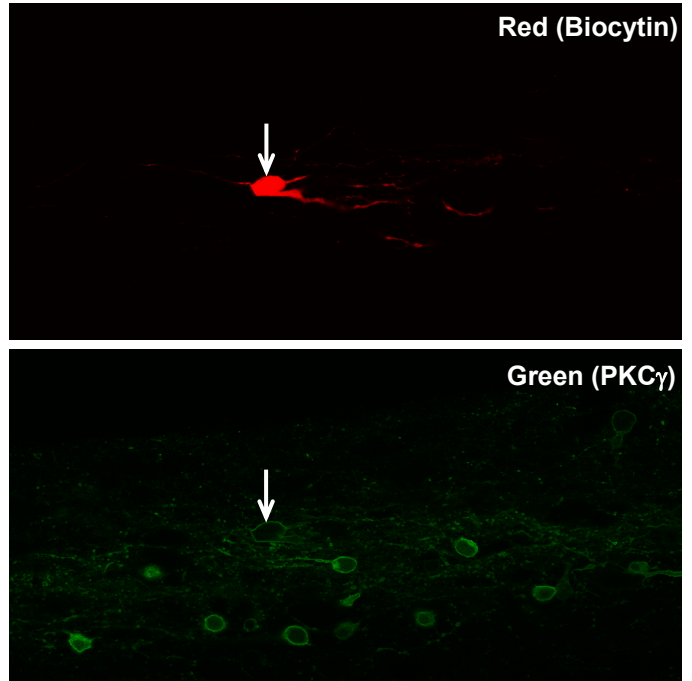

### C

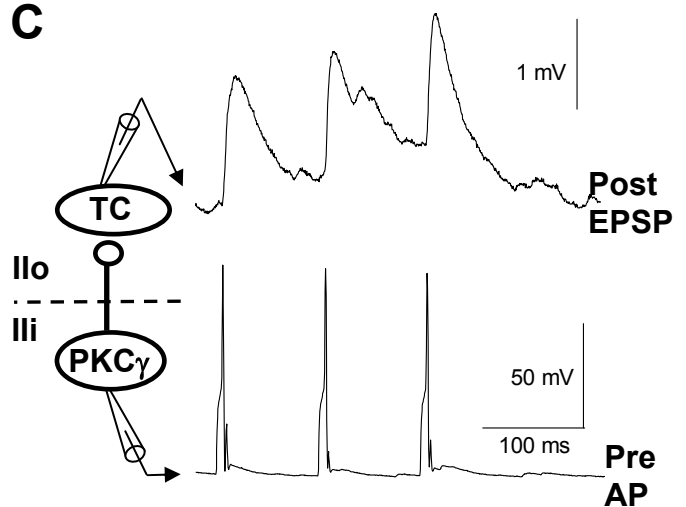

**Figure S5. An example of a monosynaptic excitatory connection between PKC $\gamma$ <sup>+</sup> and transient central (TC) neurons sampled from SNL rats. (A)** 30  $\mu\text{m}$  thick optical stack image of morphology and location of the recorded neuronal pair. Arrows indicate the presynaptic PKC $\gamma$ <sup>+</sup> positive cell, arrowhead indicates putative axon. **(B)** 1  $\mu\text{m}$  thick optical stacks of the recorded PKC $\gamma$ <sup>+</sup> cell. Scale bar, 100  $\mu\text{m}$ . **(C)** Bottom trace recorded from the presynaptic PKC $\gamma$ <sup>+</sup> neuron shows APs initiated by three successive depolarizing pulses. Top trace recorded from the postsynaptic TC neuron shows evoked unitary EPSPs displaying short-term potentiation.

**A**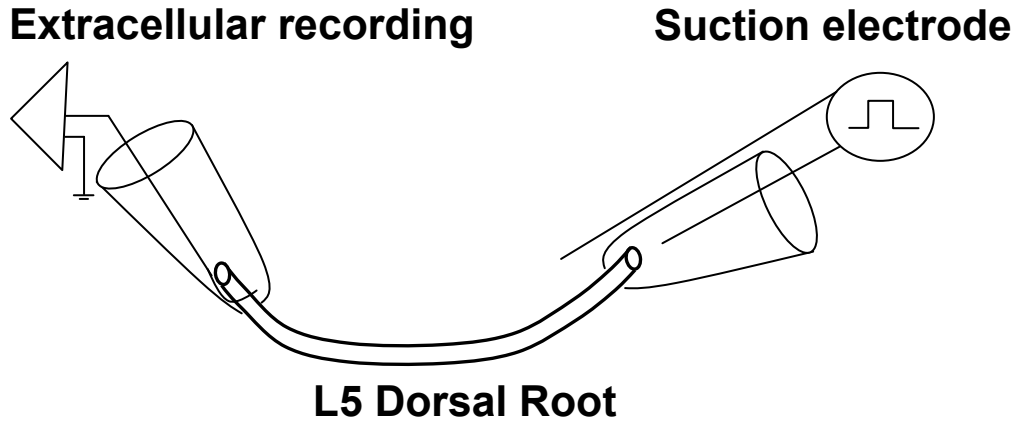**B**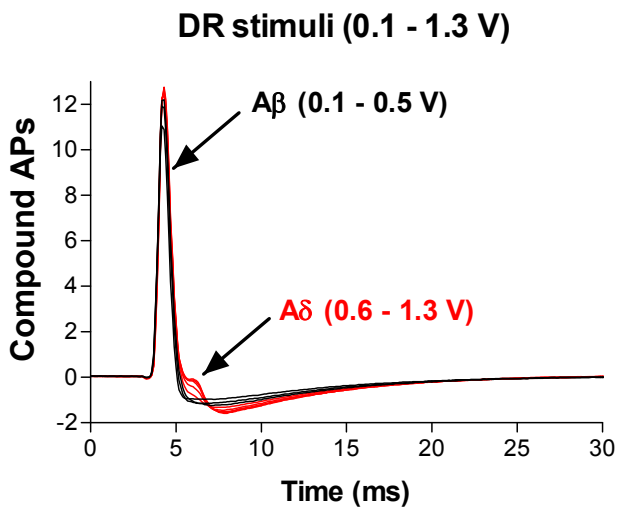**C**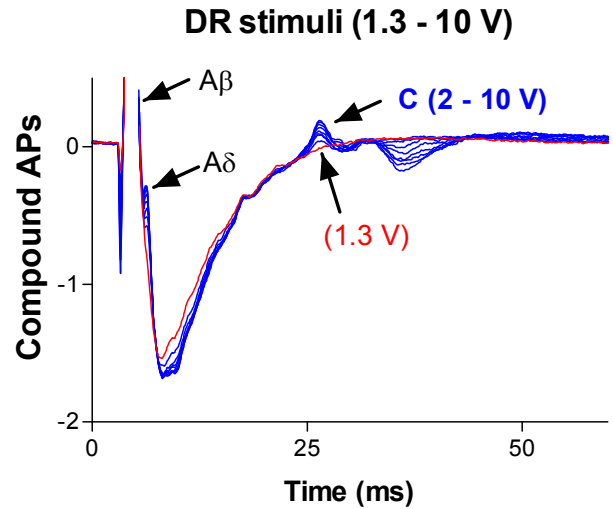

**Figure S6. Dorsal root compound AP recordings to determine the response thresholds for the activation of A $\beta$ , A $\delta$  and C fibers.** (A) Schematic of the experimental setup for recording compound APs from the L5 dorsal root (DR) under our recording conditions. A suction electrode was placed at one end to stimulate dorsal root and another at the opposite end to record extracellular compound APs. (B-C) Representative compound APs recorded from the DR at different stimulus intensities. The stimulus intensities for activation of A $\beta$ , A $\delta$  and C fibers were determined at the range of 0.1-0.5 V, 0.6-1.3 V and 2-10 V, respectively.

**Supplementary Table 1. Comparison of electrophysiological features between naïve and SNL rats**

| Cell type         | Normal (L5)            |                         |                        | SNL (L4)              |                         |                       | SNL (L5)              |                         |                       |
|-------------------|------------------------|-------------------------|------------------------|-----------------------|-------------------------|-----------------------|-----------------------|-------------------------|-----------------------|
|                   | Gly                    | PKC $\gamma$            | TC                     | Gly                   | PKC $\gamma$            | TC                    | Gly                   | PKC $\gamma$            | TC                    |
| RMPs (-mV)        | 50.7 $\pm$ 3.1<br>(16) | 60.2 $\pm$ 2.7<br>(34)  | 61.3 $\pm$ 4.7<br>(16) | 49.9 $\pm$ 4.2<br>(6) | 60.7 $\pm$ 2.7<br>(12)  | 60.5 $\pm$ 3.6<br>(6) | 50.2 $\pm$ 2.7<br>(9) | 60.5 $\pm$ 3.9<br>(16)  | 61.4 $\pm$ 4.4<br>(7) |
| AP pattern        | tonic                  | transient               | transient              | tonic                 | transient               | transient             | tonic                 | transient               | transient             |
| AP frequency (Hz) | 8.5 $\pm$ 2.2<br>(16)  | 17.3 $\pm$ 5.3*<br>(34) | 4.2 $\pm$ 1.6<br>(16)  | 8.3 $\pm$ 3.4<br>(6)  | 16.1 $\pm$ 5.2*<br>(12) | 4.6 $\pm$ 2.9<br>(6)  | 8.7 $\pm$ 3.7<br>(9)  | 21.6 $\pm$ 6.7*<br>(16) | 5.1 $\pm$ 3.1<br>(7)  |

Gly: glycinergic cell; PKC $\gamma$ : PKC $\gamma$  positive cell; TC: transient central cell; RMPs: resting membrane potentials; AP pattern: action potential discharge patterns to prolonged (1000 ms) depolarizing pulses; AP frequency: action potential discharge frequency to prolonged (1000 ms) depolarizing pulses; Tonic pattern: at moderately superthreshold depolarizations, Gly cells uniformly discharged tonically (repetitively at relatively regular intervals); Transient pattern: TC and PKC $\gamma$  neurons were equally consistent in exhibiting a burst of impulses followed by silence during maintained depolarization, but the latter with higher frequency (\* $P < 0.01$ , compared with TC cells). Results were reported as mean  $\pm$  SEM ( $n$ ).
